# Supplementary material for: Water-stress-induced breakdown of carbon–water relations: indicators from diurnal FLUXNET patterns
Source: Copernicus journal article supplement (doi:10.5194/bg-15-2433-2018), 2018-04-20
Supplement: Supplementary file 1 [file bg-15-2433-2018-supplement.zip]

Archive with 6 entries (6 files):
- bg-15-2433-2018-supplement-title-page.pdf
- FileS4.py
- FileS5.py
- FigureS2.pdf
- FileS3.py
- FileS1.html
