# Supplementary material for: Water-stress-induced breakdown of carbon–water relations: indicators from diurnal FLUXNET patterns
Source: Copernicus journal article supplement (doi:10.5194/bg-15-2433-2018), 2018-04-20
Supplement: Supplementary file 1 [file bg-15-2433-2018-supplement.zip › bg-15-2433-2018-supplement-title-page.pdf]

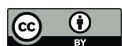

## *Supplement of*

# **Water-stress-induced breakdown of carbon–water relations: indicators from diurnal FLUXNET patterns**

**Jacob A. Nelson et al.**

*Correspondence to:* Jacob A. Nelson ([jnelson@bgc-jena.mpg.de](mailto:jnelson@bgc-jena.mpg.de))

- [bg-15-2433-2018-supplement-title-page.pdf](#)
- [FigureS2.pdf](#)
- [FileS1.html](#)
- [FileS3.py](#)
- [FileS4.py](#)
- [FileS5.py](#)

The copyright of individual parts of the supplement might differ from the CC BY 3.0 License.
