# Supplementary material for: Water-stress-induced breakdown of carbon–water relations: indicators from diurnal FLUXNET patterns
Source: Copernicus journal article supplement (doi:10.5194/bg-15-2433-2018), 2018-04-20
Supplement: Supplementary file 1 [file bg-15-2433-2018-supplement.zip › FigureS2.pdf]

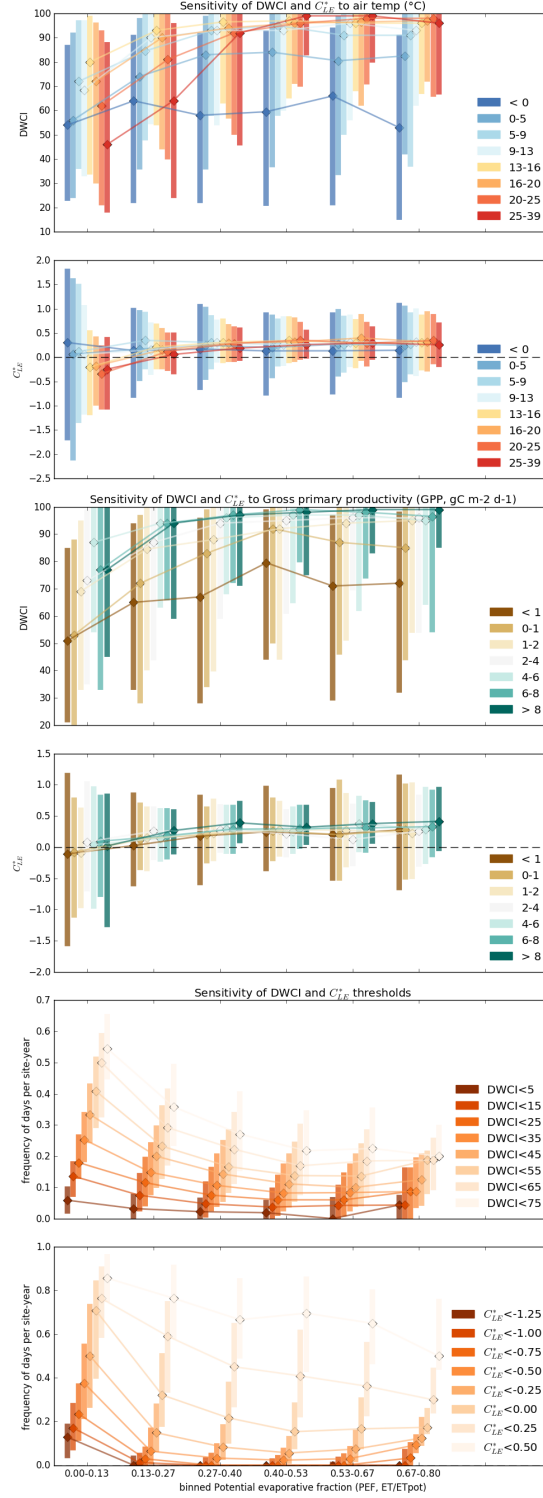

Figure 1: Figure S1. Sensitivity analysis of DWCI and  $C_{ET}^*$  to evaporative fraction (EF=ET/potential ET) under different GPP and air temperature ( $T_{air}$ ) values, as well as the sensitivity of frequency of decoupling (DWCI < threshold) and morning ( $C_{ET}^* < \text{threshold}$ ) using various thresholds. Note DWCI of 0-100 indicate lowest-highest probability of diurnal carbon:water coupling and  $C_{ET}^*$  of -1-1 indicate one hour morning shifted-one hour afternoon shifted ET. Bins for GPP and  $T_{air}$  based on percentiles to give an equal number of points per bin, with the exception of GPP<1 and  $T_{air}$ <0, which are approximately double the size of the other bins and represent periods of low plant activity such as winter. Vertical bars represent interquartile range in all cases.
