# Supplementary material for: Water-stress-induced breakdown of carbon–water relations: indicators from diurnal FLUXNET patterns
Source: Copernicus journal article supplement (doi:10.5194/bg-15-2433-2018), 2018-04-20
Supplement: Supplementary file 1 [file bg-15-2433-2018-supplement.zip › FileS1.html]

Bokeh Plot


This figure was created using the Bokeh package in Python based on the following technical example: https://bokeh.pydata.org/en/latest/docs/user\_guide/geo.html

|  | Country | PFT | Climate\_Group | textCite |
| --- | --- | --- | --- | --- |
| site |  |  |  |  |
| AT-Neu | Austria | GRA | Temperate | Wohlfahrt et al. (2008) |
| AU-Fog | Australia | SAV | Tropical | Beringer et al. (2013) |
| AU-How | Australia | WSA | Tropical | Beringer et al. (2007) |
| AU-Tum | Australia | EBF | Temperate | van Gorsel et al. (2007) |
| AU-Wac | Australia | EBF | Temperate | Kilinc et al. (2012) |
| BE-Bra | Belgium | MF | Temperate | Gielen et al. (2010) |
| BE-Jal | Belgium | MF | Temperate | Broquet et al. (2013) |
| BE-Lon | Belgium | CRO | Temperate | Moureaux et al. (2006) |
| BE-Vie | Belgium | MF | Temperate | Aubinet et al. (2001) |
| BR-Ban | Brazil | EBF | Tropical | Borma et al. (2009) |
| BR-Ji2 | Brazil | EBF | Tropical | Restrepo-Coupe et al. (2013) |
| BR-Ma2 | Brazil | EBF | Tropical | Restrepo-Coupe et al. (2013) |
| BR-Sa1 | Brazil | EBF | Tropical | Restrepo-Coupe et al. (2013) |
| BR-Sp1 | Brazil | SAV | Tropical | Restrepo-Coupe et al. (2013) |
| BW-Ghg | Botswana | SAV | Dry (arid and semi arid) | Williams and Albertson (2004) |
| BW-Ghm | Botswana | WSA | Dry (arid and semi arid) | Williams and Albertson (2004) |
| BW-Ma1 | Botswana | WSA | Dry (arid and semi arid) | Arneth et al. (2006) |
| CA-Ca1 | Canada | ENF | Temperate | Humphreys et al. (2006) |
| CA-Ca2 | Canada | ENF | Temperate | Humphreys et al. (2006) |
| CA-Ca3 | Canada | ENF | Temperate | Humphreys et al. (2006) |
| CA-Gro | Canada | MF | Temperate-Continental with hot or warm summers | McCaughey et al. (2006) |
| CA-Let | Canada | GRA | Temperate-Continental with hot or warm summers | Flanagan et al. (2002) |
| CA-Man | Canada | ENF | Boreal | Dunn et al. (2007) |
| CA-Mer | Canada | OSH | Temperate-Continental with hot or warm summers | Lafleur et al. (2003) |
| CA-NS1 | Canada | ENF | Boreal | Goulden et al. (2006) |
| CA-NS2 | Canada | ENF | Boreal | Goulden et al. (2006) |
| CA-NS3 | Canada | ENF | Boreal | Goulden et al. (2006) |
| CA-NS4 | Canada | ENF | Boreal | Goulden et al. (2006) |
| CA-NS5 | Canada | ENF | Boreal | Goulden et al. (2006) |
| CA-NS6 | Canada | OSH | Boreal | Goulden et al. (2006) |
| CA-NS7 | Canada | OSH | Boreal | Goulden et al. (2006) |
| CA-Oas | Canada | DBF | Boreal | Amiro et al. (2006) |
| CA-Obs | Canada | ENF | Boreal | Amiro et al. (2006) |
| CA-Ojp | Canada | ENF | Boreal | Amiro et al. (2006) |
| CA-Qcu | Canada | ENF | Boreal | Giasson et al. (2006) |
| CA-Qfo | Canada | ENF | Boreal | Bergeron et al. (2007) |
| CA-SF1 | Canada | ENF | Boreal | Mkhabela et al. (2009) |
| CA-SF2 | Canada | ENF | Boreal | Mkhabela et al. (2009) |
| CA-SF3 | Canada | ENF | Boreal | Mkhabela et al. (2009) |
| CA-SJ1 | Canada | ENF | Boreal | Mkhabela et al. (2009) |
| CA-SJ2 | Canada | ENF | Boreal | Mkhabela et al. (2009) |
| CA-SJ3 | Canada | ENF | Boreal | Mkhabela et al. (2009) |
| CA-TP1 | Canada | ENF | Temperate-Continental with hot or warm summers | Peichl et al. (2010) |
| CA-TP4 | Canada | ENF | Temperate-Continental with hot or warm summers | Arain and Restrepo-Coupe (2005) |
| CA-WP1 | Canada | MF | Boreal | Syed et al. (2006) |
| CA-WP2 | Canada | WET | Boreal | Glenn et al. (2006) |
| CA-WP3 | Canada | WET | Boreal | - |
| CG-Tch | Republic of Congo | TBD | Tropical | Merbold et al. (2009) |
| CH-Oe1 | Switzerland | GRA | Temperate | Ammann et al. (2007) |
| CN-Anh | China | DBF | SubTropical-Mediterranean | - |
| CN-Bed | China | EBF | Temperate-Continental with hot or warm summers | Liu et al. (2009) |
| CN-Cha | China | MF | Temperate-Continental with hot or warm summers | Guan et al. (2006) |
| CN-Do1 | China | GRA | SubTropical-Mediterranean | Yan et al. (2008) |
| CN-Do2 | China | GRA | SubTropical-Mediterranean | Yan et al. (2008) |
| CN-Do3 | China | GRA | SubTropical-Mediterranean | Yan et al. (2008) |
| CN-Du1 | China | CRO | Temperate-Continental with hot or warm summers | Zhang et al. (2007) |
| CN-Du2 | China | GRA | Temperate-Continental with hot or warm summers | Zhang et al. (2007) |
| CN-HaM | China | GRA | Arctic | - |
| CN-Hny | China | DBF | SubTropical-Mediterranean | - |
| CN-Ku1 | China | EBF | Dry (arid and semi arid) | Wilske et al. (2009) |
| CN-Xi1 | China | GRA | Temperate-Continental with hot or warm summers | Chen et al. (2009) |
| CN-Xi2 | China | GRA | Temperate-Continental with hot or warm summers | Chen et al. (2009) |
| CZ-BK1 | Czech Republic | ENF | Temperate-Continental with hot or warm summers | Acosta et al. (2008) |
| CZ-BK2 | Czech Republic | GRA | Temperate-Continental with hot or warm summers | Marek et al. (2011) |
| DE-Bay | Germany | ENF | Temperate | - |
| DE-Geb | Germany | CRO | Temperate | Anthoni et al. (2004) |
| DE-Gri | Germany | GRA | Temperate | Owen et al. (2007) |
| DE-Hai | Germany | DBF | Temperate | Knohl et al. (2003) |
| DE-Har | Germany | ENF | Temperate | Schindler et al. (2006) |
| DE-Kli | Germany | CRO | Temperate | Owen et al. (2007) |
| DE-Meh | Germany | MF | Temperate | Don et al. (2009) |
| DE-Tha | Germany | ENF | Temperate | Bernhofer et al. (2003) |
| DE-Wet | Germany | ENF | Temperate | Anthoni et al. (2004) |
| DK-Fou | Denmark | CRO | Temperate | Soegaard et al. (2003) |
| DK-Lva | Denmark | GRA | Temperate | Soussana et al. (2007) |
| DK-Ris | Denmark | CRO | Temperate | Houborg and Soegaard (2004) |
| DK-Sor | Denmark | DBF | Temperate | Pilegaard et al. (2001) |
| ES-ES1 | Spain | ENF | SubTropical-Mediterranean | Carvalhais et al. (2008) |
| ES-ES2 | Spain | CRO | SubTropical-Mediterranean | Kutsch et al. (2010) |
| ES-LMa | Spain | SAV | SubTropical-Mediterranean | Perez-Priego et al. (2017) |
| ES-VDA | Spain | GRA | Temperate | Gilmanov et al. (2007) |
| FI-Hyy | Finland | ENF | Boreal | Suni et al. (2003) |
| FI-Sii | Finland | GRA | Boreal | Haapanala et al. (2006) |
| FI-Sod | Finland | ENF | Boreal | Thum et al. (2007) |
| FR-Aur | France | CRO | Temperate | Béziat et al. (2009) |
| FR-Fon | France | DBF | Temperate | Delpierre et al. (2016) |
| FR-Gri | France | CRO | Temperate | Loubet et al. (2011) |
| FR-Hes | France | DBF | Temperate | Granier et al. (2000) |
| FR-LBr | France | ENF | Temperate | Berbigier et al. (2001) |
| FR-Lam | France | CRO | Temperate | Béziat et al. (2009) |
| FR-Lq1 | France | GRA | Temperate | Allard et al. (2007) |
| FR-Lq2 | France | GRA | Temperate | Allard et al. (2007) |
| FR-Pue | France | EBF | SubTropical-Mediterranean | Allard et al. (2008) |
| GF-Guy | French Guyana | EBF | Tropical | Bonal et al. (2008) |
| HU-Bug | Hungary | GRA | Temperate | Nagy et al. (2007) |
| HU-Mat | Hungary | GRA | Temperate | Wohlfahrt et al. (2008) |
| ID-Pag | Indonesia | EBF | Tropical | Hirano et al. (2007) |
| IE-Ca1 | Ireland | CRO | Temperate | - |
| IE-Dri | Ireland | GRA | Temperate | Peichl et al. (2011) |
| IL-Yat | Israel | ENF | Dry (arid and semi arid) | Grünzweig et al. (2003) |
| IS-Gun | Iceland | DBF | Temperate | - |
| IT-Amp | Italy | GRA | SubTropical-Mediterranean | Wohlfahrt et al. (2008) |
| IT-BCi | Italy | CRO | SubTropical-Mediterranean | Kutsch et al. (2010) |
| IT-Be2 | Italy | CRO | Temperate | - |
| IT-Cas | Italy | CRO | SubTropical-Mediterranean | - |
| IT-Col | Italy | DBF | SubTropical-Mediterranean | Valentini et al. (1996) |
| IT-Cpz | Italy | EBF | SubTropical-Mediterranean | Garbulsky et al. (2008) |
| IT-LMa | Italy | DBF | Temperate | Broquet et al. (2013) |
| IT-Lav | Italy | ENF | Temperate | Cescatti and Marcolla (2004) |
| IT-Lec | Italy | EBF | SubTropical-Mediterranean | - |
| IT-MBo | Italy | GRA | Temperate | Marcolla and Cescatti (2005) |
| IT-Mal | Italy | GRA | Temperate | Gilmanov et al. (2007) |
| IT-Noe | Italy | CSH | SubTropical-Mediterranean | Spano et al. (2009) |
| IT-Non | Italy | DBF | SubTropical-Mediterranean | Reichstein et al. (2003) |
| IT-PT1 | Italy | DBF | SubTropical-Mediterranean | Migliavacca et al. (2009) |
| IT-Pia | Italy | OSH | SubTropical-Mediterranean | Vaccari et al. (2012) |
| IT-Ren | Italy | ENF | Temperate | Marcolla et al. (2005) |
| IT-Ro1 | Italy | DBF | SubTropical-Mediterranean | Rey et al. (2002) |
| IT-Ro2 | Italy | DBF | SubTropical-Mediterranean | Tedeschi et al. (2006) |
| IT-SRo | Italy | ENF | SubTropical-Mediterranean | Chiesi et al. (2005) |
| IT-Vig | Italy | DBF | SubTropical-Mediterranean | - |
| JP-Mas | Japan | CRO | SubTropical-Mediterranean | Saito et al. (2005) |
| JP-Tef | Japan | MF | Temperate-Continental with hot or warm summers | - |
| JP-Tom | Japan | MF | Temperate-Continental with hot or warm summers | Hirano et al. (2003) |
| NL-Ca1 | Netherlands | GRA | Temperate | Jacobs et al. (2007) |
| NL-Hor | Netherlands | GRA | Temperate | Hendriks et al. (2007) |
| NL-Lan | Netherlands | CRO | Temperate | Moors et al. (2010) |
| NL-Loo | Netherlands | ENF | Temperate | Dolman et al. (2002) |
| NL-Lut | Netherlands | CRO | Temperate | Moors et al. (2010) |
| PT-Esp | Portugal | EBF | SubTropical-Mediterranean | Rodrigues et al. (2011) |
| PT-Mi1 | Portugal | WSA | SubTropical-Mediterranean | Pereira et al. (2007) |
| PT-Mi2 | Portugal | GRA | SubTropical-Mediterranean | Pereira et al. (2007) |
| RU-Cok | Russia | OSH | Boreal | van der Molen et al. (2007) |
| RU-Fyo | Russia | ENF | Temperate-Continental with hot or warm summers | Kurbatova et al. (2008) |
| RU-Ha1 | Russia | GRA | Boreal | Belelli Marchesini et al. (2007) |
| RU-Zot | Russia | ENF | Boreal | Kurbatova et al. (2002) |
| SE-Abi | Sweden | DBF | Arctic | Christensen et al. (2007) |
| SE-Faj | Sweden | WET | Temperate | - |
| SE-Nor | Sweden | ENF | Temperate-Continental with hot or warm summers | Lagergren et al. (2008) |
| SE-St1 | Sweden | DBF | Arctic | Christensen et al. (2012) |
| SK-Tat | Slovak Republic | ENF | Temperate-Continental with hot or warm summers | Matese et al. (2008) |
| UK-EBu | UK | GRA | Temperate | Famulari et al. (2004) |
| UK-ESa | UK | CRO | Temperate | Smallman et al. (2013) |
| UK-Gri | UK | ENF | Temperate | Sturm et al. (2005) |
| UK-Ham | UK | DBF | Temperate | Wilkinson et al. (2012) |
| UK-Her | UK | CRO | Temperate | Broquet et al. (2013) |
| UK-PL3 | UK | DBF | Temperate | - |
| US-ARM | USA | CRO | SubTropical-Mediterranean | Fischer et al. (2007) |
| US-Aud | USA | GRA | Dry (arid and semi arid) | Krishnan et al. (2012) |
| US-Bar | USA | DBF | Temperate-Continental with hot or warm summers | Jenkins et al. (2007) |
| US-Bkg | USA | GRA | Temperate-Continental with hot or warm summers | Yang et al. (2017) |
| US-Blo | USA | ENF | SubTropical-Mediterranean | Goldstein et al. (2000) |
| US-Bn1 | USA | ENF | Boreal | Liu et al. (2005) |
| US-Bn2 | USA | DBF | Boreal | Liu et al. (2005) |
| US-Bn3 | USA | OSH | Boreal | Liu et al. (2005) |
| US-Bo1 | USA | CRO | Temperate-Continental with hot or warm summers | Meyers and Hollinger (2004) |
| US-Bo2 | USA | CRO | Temperate-Continental with hot or warm summers | Meyers and Hollinger (2004) |
| US-CaV | USA | GRA | Temperate | Wang et al. (2008) |
| US-Dk1 | USA | GRA | SubTropical-Mediterranean | Stoy et al. (2006) |
| US-Dk2 | USA | MF | SubTropical-Mediterranean | Stoy et al. (2006) |
| US-Dk3 | USA | MF | SubTropical-Mediterranean | Stoy et al. (2006) |
| US-FPe | USA | GRA | Dry (arid and semi arid) | Wang et al. (2008) |
| US-Fmf | USA | ENF | SubTropical-Mediterranean | - |
| US-Fuf | USA | ENF | Temperate-Continental | Dore et al. (2008) |
| US-Fwf | USA | GRA | Temperate-Continental | Dore et al. (2008) |
| US-Goo | USA | GRA | SubTropical-Mediterranean | Wilson and Meyers (2007) |
| US-Ha1 | USA | DBF | Temperate-Continental with hot or warm summers | Urbanski et al. (2007) |
| US-Ho1 | USA | ENF | Temperate-Continental with hot or warm summers | Hollinger et al. (2004) |
| US-IB1 | USA | CRO | Temperate-Continental with hot or warm summers | Allison et al. (2007) |
| US-IB2 | USA | GRA | Temperate-Continental with hot or warm summers | Gomez-Casanovas et al. (2012) |
| US-KS1 | USA | ENF | SubTropical-Mediterranean | Bracho et al. (2008) |
| US-KS2 | USA | CSH | SubTropical-Mediterranean | Powell et al. (2006) |
| US-MMS | USA | DBF | SubTropical-Mediterranean | Schmid et al. (2000) |
| US-MOz | USA | DBF | SubTropical-Mediterranean | Gu et al. (2006) |
| US-Me1 | USA | ENF | SubTropical-Mediterranean | Irvine et al. (2007) |
| US-Me2 | USA | ENF | SubTropical-Mediterranean | Vickers et al. (2009) |
| US-Me3 | USA | ENF | SubTropical-Mediterranean | Vickers et al. (2009) |
| US-NC1 | USA | OSH | SubTropical-Mediterranean | Noormets et al. (2012) |
| US-NC2 | USA | ENF | SubTropical-Mediterranean | Noormets et al. (2012) |
| US-NR1 | USA | ENF | Boreal | Monson et al. (2002) |
| US-Ne1 | USA | CRO | Temperate-Continental with hot or warm summers | Verma et al. (2005) |
| US-Ne2 | USA | CRO | Temperate-Continental with hot or warm summers | Verma et al. (2005) |
| US-Ne3 | USA | CRO | Temperate-Continental with hot or warm summers | Verma et al. (2005) |
| US-SO2 | USA | WSA | SubTropical-Mediterranean | Lipson et al. (2005) |
| US-SO3 | USA | WSA | SubTropical-Mediterranean | Lipson et al. (2005) |
| US-SO4 | USA | WSA | SubTropical-Mediterranean | Lipson et al. (2005) |
| US-SP1 | USA | ENF | SubTropical-Mediterranean | Powell et al. (2008) |
| US-SP2 | USA | ENF | SubTropical-Mediterranean | Bracho et al. (2012) |
| US-SP3 | USA | ENF | SubTropical-Mediterranean | Bracho et al. (2012) |
| US-SP4 | USA | ENF | SubTropical-Mediterranean | - |
| US-SRM | USA | SAV | Dry (arid and semi arid) | Scott et al. (2009) |
| US-Syv | USA | MF | Temperate-Continental with hot or warm summers | Desai et al. (2005) |
| US-Ton | USA | WSA | SubTropical-Mediterranean | Ma et al. (2007) |
| US-UMB | USA | DBF | Temperate-Continental with hot or warm summers | Gough et al. (2008) |
| US-Var | USA | GRA | SubTropical-Mediterranean | Ma et al. (2007) |
| US-WCr | USA | DBF | Temperate-Continental with hot or warm summers | Cook et al. (2004) |
| US-Wi0 | USA | ENF | Temperate-Continental with hot or warm summers | Desai et al. (2008) |
| US-Wi1 | USA | DBF | Temperate-Continental with hot or warm summers | Desai et al. (2008) |
| US-Wi4 | USA | ENF | Temperate-Continental with hot or warm summers | Desai et al. (2008) |
| US-Wi5 | USA | ENF | Temperate-Continental with hot or warm summers | Desai et al. (2008) |
| US-Wi6 | USA | OSH | Temperate-Continental with hot or warm summers | Desai et al. (2008) |
| US-Wi8 | USA | DBF | Temperate-Continental with hot or warm summers | Desai et al. (2008) |
| US-Wi9 | USA | ENF | Temperate-Continental with hot or warm summers | - |
| US-Wkg | USA | GRA | Dry (arid and semi arid) | Scott et al. (2010) |
| US-Wrc | USA | ENF | Temperate | Falk et al. (2008) |
| VU-Coc | Vanuatu | ENF | Tropical | Roupsard et al. (2006) |

Acosta, Manuel, Marian Pavelka, Radek Pokorný, Dalibor Janouš, and Michal V. Marek. 2008. “Seasonal Variation in CO2 Efflux of Stems and Branches of Norway Spruce Trees.” *Annals of Botany* 101 (3): 469–77. doi:10.1093/aob/mcm304.

Allard, V., J. M. Ourcival, S. Rambal, R. Joffre, and A. Rocheteau. 2008. “Seasonal and Annual Variation of Carbon Exchange in an Evergreen Mediterranean Forest in Southern France.” *Global Change Biology* 14 (4): 714–25. doi:10.1111/j.1365-2486.2008.01539.x.

Allard, Vincent, J.-F. Soussana, Robert Falcimagne, Paul Berbigier, Jean-Marc Bonnefond, E. Ceschia, Pascal D’hour, et al. 2007. “The Role of Grazing Management for the Net Biome Productivity and Greenhouse Gas Budget (CO2, N2O and CH4) of Semi-Natural Grassland.” *Agriculture, Ecosystems & Environment* 121 (1–2): 47–58. doi:10.1016/j.agee.2006.12.004.

Allison, Victoria J., Zhanna Yermakov, R. Michael Miller, Julie D. Jastrow, and Roser Matamala. 2007. “Using Landscape and Depth Gradients to Decouple the Impact of Correlated Environmental Variables on Soil Microbial Community Composition.” *Soil Biology and Biochemistry* 39 (2): 505–16. doi:10.1016/j.soilbio.2006.08.021.

Amiro, B. D., A. G. Barr, T. A. Black, H. Iwashita, N. Kljun, J. H. McCaughey, K. Morgenstern, et al. 2006. “Carbon, Energy and Water Fluxes at Mature and Disturbed Forest Sites, Saskatchewan, Canada.” *Agricultural and Forest Meteorology* 136 (3): 237–51. doi:10.1016/j.agrformet.2004.11.012.

Ammann, C., C. R. Flechard, J. Leifeld, A. Neftel, and J. Fuhrer. 2007. “The Carbon Budget of Newly Established Temperate Grassland Depends on Management Intensity.” *Agriculture, Ecosystems & Environment* 121 (1–2): 5–20. doi:10.1016/j.agee.2006.12.002.

Anthoni, P. M., A. Knohl, C. Rebmann, A. Freibauer, M. Mund, W. Ziegler, O. Kolle, and E.-D. Schulze. 2004. “Forest and Agricultural Land-Use-Dependent CO2 Exchange in Thuringia, Germany.” *Global Change Biology* 10 (12): 2005–19. doi:10.1111/j.1365-2486.2004.00863.x.

Arain, M. Altaf, and Natalia Restrepo-Coupe. 2005. “Net Ecosystem Production in a Temperate Pine Plantation in Southeastern Canada.” *Agricultural and Forest Meteorology* 128 (3–4): 223–41. doi:10.1016/j.agrformet.2004.10.003.

Arneth, A., E. M. Veenendaal, C. Best, W. Timmermans, O. Kolle, L. Montagnani, and O. Shibistova. 2006. “Water Use Strategies and Ecosystem-Atmosphere Exchange of CO2 in Two Highly Seasonal Environments.” *Biogeosciences* 3 (4): 421–37. doi:10.5194/bg-3-421-2006.

Aubinet, Marc, B. Chermanne, M. Vandenhaute, B. Longdoz, M. Yernaux, and E. Laitat. 2001. “Long Term Carbon Dioxide Exchange Above a Mixed Forest in the Belgian Ardennes.” *Agricultural and Forest Meteorology* 108 (4): 293–315. doi:10.1016/S0168-1923(01)00244-1.

Belelli Marchesini, L., D. Papale, M. Reichstein, N. Vuichard, N. Tchebakova, and R. Valentini. 2007. “Carbon Balance Assessment of a Natural Steppe of Southern Siberia by Multiple Constraint Approach.” *Biogeosciences* 4 (4): 581–95. doi:10.5194/bg-4-581-2007.

Berbigier, Paul, Jean-Marc Bonnefond, and Patricia Mellmann. 2001. “CO2 and Water Vapour Fluxes for 2 Years Above Euroflux Forest Site.” *Agricultural and Forest Meteorology* 108 (3): 183–97. doi:10.1016/S0168-1923(01)00240-4.

Bergeron, Onil, Hank A. Margolis, T. Andrew Black, Carole Coursolle, Allison L. Dunn, Alan G. Barr, and Steven C. Wofsy. 2007. “Comparison of Carbon Dioxide Fluxes over Three Boreal Black Spruce Forests in Canada.” *Global Change Biology* 13 (1): 89–107. doi:10.1111/j.1365-2486.2006.01281.x.

Beringer, Jason, Lindsay B. Hutley, Nigel J. Tapper, and Lucas A. Cernusak. 2007. “Savanna Fires and Their Impact on Net Ecosystem Productivity in North Australia.” *Global Change Biology* 13 (5): 990–1004. doi:10.1111/j.1365-2486.2007.01334.x.

Beringer, Jason, Stephen J. Livesley, Jennifer Randle, and Lindsay B. Hutley. 2013. “Carbon Dioxide Fluxes Dominate the Greenhouse Gas Exchanges of a Seasonal Wetland in the Wet-Dry Tropics of Northern Australia.” *Agricultural and Forest Meteorology* 182: 239–47. doi:10.1016/j.agrformet.2013.06.008.

Bernhofer, C., M. Aubinet, R. Clement, A. Grelle, T. Grünwald, A. Ibrom, P. Jarvis, C. Rebmann, E.-D. Schulze, and J. D. Tenhunen. 2003. “Spruce Forests (Norway and Sitka Spruce, Including Douglas Fir): Carbon and Water Fluxes and Balances, Ecological and Ecophysiological Determinants.” In *Fluxes of Carbon, Water and Energy of European Forests*, edited by Riccardo Valentini, 99–123. Springer. doi:10.1007/978-3-662-05171-9\_6.

Béziat, Pierre, Eric Ceschia, and Gérard Dedieu. 2009. “Carbon Balance of a Three Crop Succession over Two Cropland Sites in South West France.” *Agricultural and Forest Meteorology* 149 (10): 1628–45. doi:10.1016/j.agrformet.2009.05.004.

Bonal, Damien, Alexandre Bosc, Stéphane Ponton, Jean-Yves Goret, Benoît Burban, Patrick Gross, Jean-Marc Bonnefond, et al. 2008. “Impact of Severe Dry Season on Net Ecosystem Exchange in the Neotropical Rainforest of French Guiana.” *Global Change Biology* 14 (8): 1917–33. doi:10.1111/j.1365-2486.2008.01610.x.

Borma, L. S., H. R. da Rocha, O. M. Cabral, C. von Randow, E. Collicchio, D. Kurzatkowski, P. J. Brugger, et al. 2009. “Atmosphere and Hydrological Controls of the Evapotranspiration over a Floodplain Forest in the Bananal Island Region, Amazonia.” *Journal of Geophysical Research: Biogeosciences* 114 (G1). doi:10.1029/2007JG000641.

Bracho, Rosvel, Thomas L. Powell, Sabina Dore, Jiahong Li, C. Ross Hinkle, and Bert G. Drake. 2008. “Environmental and Biological Controls on Water and Energy Exchange in Florida Scrub Oak and Pine Flatwoods Ecosystems.” *Journal of Geophysical Research: Biogeosciences* 113 (G2): 1–13. doi:10.1029/2007JG000469.

Bracho, Rosvel, Gregory Starr, Henry L. Gholz, Timothy A. Martin, Wendell P. Cropper, and Henry W. Loescher. 2012. “Controls on Carbon Dynamics by Ecosystem Structure and Climate for Southeastern U.S. Slash Pine Plantations.” *Ecological Monographs* 82 (1): 101–28. doi:10.1890/11-0587.1.

Broquet, G., F. Chevallierand F.-M. Bréon, N. Kadygrov, M. Alemanno, F. Apadula, S. Hammer, L. Haszpra, et al. 2013. “Regional Inversion of CO2 Ecosystem Fluxes from Atmospheric Measurements: Reliability of the Uncertainty Estimates.” *Atmospheric Chemistry and Physics* 13 (17): 9039–56. doi:10.5194/acp-13-9039-2013.

Carvalhais, Nuno, Markus Reichstein, Júlia Seixas, G. James Collatz, João Santos Pereira, Paul Berbigier, Arnaud Carrara, et al. 2008. “Implications of the Carbon Cycle Steady State Assumption for Biogeochemical Modeling Performance and Inverse Parameter Retrieval.” *Global Biogeochemical Cycles* 22 (2): 1–16. doi:10.1029/2007GB003033.

Cescatti, A., and B. Marcolla. 2004. “Drag Coefficient and Turbulence Intensity in Conifer Canopies.” *Agricultural and Forest Meteorology* 121 (3–4): 197–206. doi:10.1016/j.agrformet.2003.08.028.

Chen, Shiping, Jiquan Chen, Guanghui Lin, Wenli Zhang, Haixia Miao, Long Wei, Jianhui Huang, and Xingguo Han. 2009. “Energy Balance and Partition in Inner Mongolia Steppe Ecosystems with Different Land Use Types.” *Agricultural and Forest Meteorology* 149 (11): 1800–1809. doi:10.1016/j.agrformet.2009.06.009.

Chiesi, M., F. Maselli, M. Bindi, L. Fibbi, P. Cherubini, E. Arlotta, G. Tirone, G. Matteucci, and G. Seufert. 2005. “Modelling Carbon Budget of Mediterranean Forests Using Ground and Remote Sensing Measurements.” *Agricultural and Forest Meteorology* 135 (1): 22–34. doi:10.1016/j.agrformet.2005.09.011.

Christensen, T. R., T. Johansson, M. Olsrud, L. Ström, A. Lindroth, M. Mastepanov, N. Malmer, T. Friborg, P. Crill, and T. V. Callaghan. 2007. “A Catchment-Scale Carbon and Greenhouse Gas Budget of a Subarctic Landscape.” *Philosophical Transactions of the Royal Society of London A: Mathematical, Physical and Engineering Sciences* 365 (1856): 1643–56. doi:10.1098/rsta.2007.2035.

Christensen, Torben R., Marcin Jackowicz-Korczyński, Mika Aurela, Patrick Crill, Michal Heliasz, Mikhail Mastepanov, and Thomas Friborg. 2012. “Monitoring the Multi-Year Carbon Balance of a Subarctic Palsa Mire with Micrometeorological Techniques.” *AMBIO* 41 (3): 207–17. doi:10.1007/s13280-012-0302-5.

Cook, Bruce D., Kenneth J. Davis, Weiguo Wang, Ankur Desai, Bradford W. Berger, Ron M. Teclaw, Jonathan G. Martin, et al. 2004. “Carbon Exchange and Venting Anomalies in an Upland Deciduous Forest in Northern Wisconsin, Usa.” *Agricultural and Forest Meteorology* 126 (3–4): 271–95. doi:10.1016/j.agrformet.2004.06.008.

Delpierre, Nicolas, Daniel Berveiller, Elena Granda, and Eric Dufrêne. 2016. “Wood Phenology, Not Carbon Input, Controls the Interannual Variability of Wood Growth in a Temperate Oak Forest.” *New Phytologist* 210 (2): 459–70. doi:10.1111/nph.13771.

Desai, Ankur R., Paul V. Bolstad, Bruce D. Cook, Kenneth J. Davis, and Eileen V. Carey. 2005. “Comparing Net Ecosystem Exchange of Carbon Dioxide Between an Old-Growth and Mature Forest in the Upper Midwest, USA.” *Agricultural and Forest Meteorology* 128 (1–2): 33–55. doi:10.1016/j.agrformet.2004.09.005.

Desai, Ankur R., Asko Noormets, Paul V. Bolstad, Jiquan Chen, Bruce D. Cook, Kenneth J. Davis, Eugenie S. Euskirchen, et al. 2008. “Influence of Vegetation and Seasonal Forcing on Carbon Dioxide Fluxes Across the Upper Midwest, USA: Implications for Regional Scaling.” *Agricultural and Forest Meteorology* 148 (2): 288–308. doi:10.1016/j.agrformet.2007.08.001.

Dolman, A. J., E. J. Moors, and J. A. Elbers. 2002. “The Carbon Uptake of a Mid Latitude Pine Forest Growing on Sandy Soil.” *Agricultural and Forest Meteorology* 111 (3): 157–70. doi:10.1016/S0168-1923(02)00024-2.

Don, Axel, Corinna Rebmann, Olaf Kolle, Michael Scherer-Lorenzen, and Ernst-Detlef Schulze. 2009. “Impact of Afforestation-Associated Management Changes on the Carbon Balance of Grassland.” *Global Change Biology* 15 (8): 1990–2002. doi:10.1111/j.1365-2486.2009.01873.x.

Dore, Sabina, Thomas E. Kolb, M. Montes-Helu, B. W. Sullivan, W. D. Winslow, S. C. Hart, J. P. Kaye, George W. Koch, and Bruce A. Hungate. 2008. “Long-Term Impact of a Stand-Replacing Fire on Ecosystem CO2 Exchange of a Ponderosa Pine Forest.” *Global Change Biology* 14 (8): 1801–20. doi:10.1111/j.1365-2486.2008.01613.x.

Dunn, Allison L., Carol C. Barford, Steven C. Wofsy, Michael L. Goulden, and Bruce C. Daube. 2007. “A Long-Term Record of Carbon Exchange in a Boreal Black Spruce Forest: Means, Responses to Interannual Variability, and Decadal Trends.” *Global Change Biology* 13 (3): 577–90. doi:10.1111/j.1365-2486.2006.01221.x.

Falk, Matthias, Sonia Wharton, Matt Schroeder, Susan Ustin, and Kyaw Tha Paw U. 2008. “Flux Partitioning in an Old-Growth Forest: Seasonal and Interannual Dynamics.” *Tree Physiology* 28 (4): 509–20. doi:10.1093/treephys/28.4.509.

Famulari, D., D. Fowler, K. Hargreaves, C. Milford, E. Nemitz, M. A. Sutton, and K. Weston. 2004. “Measuring Eddy Covariance Fluxes of Ammonia Using Tunable Diode Laser Absorption Spectroscopy.” *Water, Air, & Soil Pollution: Focus* 4 (6): 151–58. doi:10.1007/s11267-004-3025-1.

Fischer, Marc L., David P. Billesbach, Joseph A. Berry, William J. Riley, and Margaret S. Torn. 2007. “Spatiotemporal Variations in Growing Season Exchanges of CO2, H2O, and Sensible Heat in Agricultural Fields of the Southern Great Plains.” *Earth Interactions* 11 (17): 1–21. doi:10.1175/EI231.1.

Flanagan, Lawrence B., Linda A. Wever, and Peter J. Carlson. 2002. “Seasonal and Interannual Variation in Carbon Dioxide Exchange and Carbon Balance in a Northern Temperate Grassland.” *Global Change Biology* 8 (7): 599–615. doi:10.1046/j.1365-2486.2002.00491.x.

Garbulsky, Martín, Josep Peñuelas, Dario Papale, and Iolanda Filella. 2008. “Remote Estimation of Carbon Dioxide Uptake by a Mediterranean Forest.” *Global Change Biology* 14 (12): 2860–7. doi:10.1111/j.1365-2486.2008.01684.x.

Giasson, Marc-Andre, Carole Coursolle, and Hank A. Margolis. 2006. “Ecosystem-Level CO2 Fluxes from a Boreal Cutover in Eastern Canada Before and After Scarification.” *Agricultural and Forest Meteorology* 140 (1–4): 23–40. doi:10.1016/j.agrformet.2006.08.001.

Gielen, B., H. Verbeeck, J. Neirynck, D. A. Sampson, F. Vermeiren, and I. A. Janssens. 2010. “Decadal Water Balance of a Temperate Scots Pine Forest (Pinus Sylvestris L.) Based on Measurements and Modelling.” *Biogeosciences* 7 (4): 1247–61. doi:10.5194/bg-7-1247-2010.

Gilmanov, T. G., J. F. Soussana, L. Aires, V. Allard, C. Ammann, M. Balzarolo, Z. Barcza, et al. 2007. “Partitioning European Grassland Net Ecosystem CO2 Exchange into Gross Primary Productivity and Ecosystem Respiration Using Light Response Function Analysis.” *Agriculture, Ecosystems & Environment* 121 (1): 93–120. doi:10.1016/j.agee.2006.12.008.

Glenn, Aaron J., Lawrence B. Flanagan, Kamran H. Syed, and Peter J. Carlson. 2006. “Comparison of Net Ecosystem CO2 Exchange in Two Peatlands in Western Canada with Contrasting Dominant Vegetation, Sphagnum and Carex.” *Agricultural and Forest Meteorology* 140 (1): 115–35. doi:10.1016/j.agrformet.2006.03.020.

Goldstein, A. H., N. E. Hultman, J. M. Fracheboud, M. R. Bauer, J. A. Panek, M. Xu, Y. Qi, A. B. Guenther, and W. Baugh. 2000. “Effects of Climate Variability on the Carbon Dioxide, Water, and Sensible Heat Fluxes Above a Ponderosa Pine Plantation in the Sierra Nevada (CA).” *Agricultural and Forest Meteorology* 101 (2–3): 113–29. doi:10.1016/S0168-1923(99)00168-9.

Gomez-Casanovas, Nuria, Roser Matamala, David R. Cook, and Miquel A. Gonzalez-Meler. 2012. “Net Ecosystem Exchange Modifies the Relationship Between the Autotrophic and Heterotrophic Components of Soil Respiration with Abiotic Factors in Prairie Grasslands.” *Global Change Biology* 18 (8): 2532–45. doi:10.1111/j.1365-2486.2012.02721.x.

Gorsel, Eva van, Ray Leuning, Helen A. Cleugh, Heather Keith, and Tanja Suni. 2007. “Nocturnal Carbon Efflux: Reconciliation of Eddy Covariance and Chamber Measurements Using an Alternative to the U\*-Threshold Filtering Technique.” *Tellus B: Chemical and Physical Meteorology* 59 (3): 397–403. doi:10.1111/j.1600-0889.2007.00252.x.

Gough, C. M., C. S. Vogel, H. P. Schmid, H.-B. Su, and P. S. Curtis. 2008. “Multi-Year Convergence of Biometric and Meteorological Estimates of Forest Carbon Storage.” *Agricultural and Forest Meteorology* 148 (2): 158–70. doi:10.1016/j.agrformet.2007.08.004.

Goulden, Michael L., Gregory C. Winston, Andrew M. S. McMillan, Marcy E. Litvak, Edward L. Read, Adrian V. Rocha, and J. Rob Elliot. 2006. “An Eddy Covariance Mesonet to Measure the Effect of Forest Age on Land–atmosphere Exchange.” *Global Change Biology* 12 (11): 2146–62. doi:10.1111/j.1365-2486.2006.01251.x.

Granier, A., E. Ceschia, C. Damesin, E. Dufrêne, D. Epron, P. Gross, S. Lebaube, et al. 2000. “The Carbon Balance of a Young Beech Forest.” *Functional Ecology* 14 (3): 312–25. doi:10.1046/j.1365-2435.2000.00434.x.

Grünzweig, J. M., T. Lin, E. Rotenberg, A. Schwartz, and D. Yakir. 2003. “Carbon Sequestration in Arid-Land Forest.” *Global Change Biology* 9 (5): 791–99. doi:10.1046/j.1365-2486.2003.00612.x.

Gu, Lianhong, Tilden Meyers, Stephen G. Pallardy, Paul J. Hanson, Bai Yang, Mark Heuer, Kevin P. Hosman, Jeffery S. Riggs, Dan Sluss, and Stan D. Wullschleger. 2006. “Direct and Indirect Effects of Atmospheric Conditions and Soil Moisture on Surface Energy Partitioning Revealed by a Prolonged Drought at a Temperate Forest Site.” *Journal of Geophysical Research: Atmospheres* 111 (D16): 1–13. doi:10.1029/2006JD007161.

Guan, De-Xin, Jia-Bing Wu, Xiao-Song Zhao, Shi-Jie Han, Gui-Rui Yu, Xiao-Min Sun, and Chang-Jie Jin. 2006. “CO2 Fluxes over an Old, Temperate Mixed Forest in Northeastern China.” *Agricultural and Forest Meteorology* 137 (3): 138–49. doi:10.1016/j.agrformet.2006.02.003.

Haapanala, S., J. Rinne, K.-H. Pystynen, H. Hellén, H. Hakola, and T. Riutta. 2006. “Measurements of Hydrocarbon Emissions from a Boreal Fen Using the REA Technique.” *Biogeosciences* 3 (1): 103–12. doi:10.5194/bg-3-103-2006.

Hendriks, D. M. D., J. van Huissteden, A. J. Dolman, and M. K. van der Molen. 2007. “The Full Greenhouse Gas Balance of an Abandoned Peat Meadow.” *Biogeosciences* 4 (3): 411–24. doi:10.5194/bg-4-411-2007.

Hirano, Takashi, Ryuichi Hirata, Yasumi Fujinuma, Nobuko Saigusa, Susumu Yamamoto, Yoshinobu Harazono, Masayuki Takada, Koh Inukai, and Gen Inoue. 2003. “CO2 and Water Vapor Exchange of a Larch Forest in Northern Japan.” *Tellus B: Chemical and Physical Meteorology* 55 (2): 244–57. doi:10.1034/j.1600-0889.2003.00063.x.

Hirano, Takashi, Hendrik Segah, Tsuyoshi Harada, Suwido Limin, Tania June, Ryuichi Hirata, and Mitsuru Osaki. 2007. “Carbon Dioxide Balance of a Tropical Peat Swamp Forest in Kalimantan, Indonesia.” *Global Change Biology* 13 (2): 412–25. doi:10.1111/j.1365-2486.2006.01301.x.

Hollinger, D. Y., J. Aber, B. Dail, E. A. Davidson, S. M. Goltz, H. Hughes, M. Y. Leclerc, et al. 2004. “Spatial and Temporal Variability in Forest–atmosphere CO2 Exchange.” *Global Change Biology* 10 (10): 1689–1706. doi:10.1111/j.1365-2486.2004.00847.x.

Houborg, Rasmus Moeller, and Henrik Soegaard. 2004. “Regional Simulation of Ecosystem CO2 and Water Vapor Exchange for Agricultural Land Using NOAA AVHRR and Terra MODIS Satellite Data. Application to Zealand, Denmark.” *Remote Sensing of Environment* 93 (1): 150–67. doi:10.1016/j.rse.2004.07.001.

Humphreys, Elyn R., T. Andrew Black, Kai Morgenstern, Tiebo Cai, Gordon B. Drewitt, Zoran Nesic, and J. A. Trofymow. 2006. “Carbon Dioxide Fluxes in Coastal Douglas-fir Stands at Different Stages of Development After Clearcut Harvesting.” *Agricultural and Forest Meteorology* 140 (1): 6–22. doi:10.1016/j.agrformet.2006.03.018.

Irvine, J., B. E. Law, and K. A. Hibbard. 2007. “Postfire Carbon Pools and Fluxes in Semiarid Ponderosa Pine in Central Oregon.” *Global Change Biology* 13 (8): 1748–60. doi:10.1111/j.1365-2486.2007.01368.x.

Jacobs, C. M. J., A. F. G. Jacobs, F. C. Bosveld, D. M. D. Hendriks, A. Hensen, P. S. Kroon, E. J. Moors, L. Nol, A. Schrier-Uijl, and E. M. Veenendaal. 2007. “Variability of Annual CO2 Exchange from Dutch Grasslands.” *Biogeosciences* 4 (5): 803–16. doi:10.5194/bg-4-803-2007.

Jenkins, J. P., A. D. Richardson, B. H. Braswell, S. V. Ollinger, D. Y. Hollinger, and M.-L. Smith. 2007. “Refining Light-Use Efficiency Calculations for a Deciduous Forest Canopy Using Simultaneous Tower-Based Carbon Flux and Radiometric Measurements.” *Agricultural and Forest Meteorology* 143 (1–2): 64–79. doi:10.1016/j.agrformet.2006.11.008.

Kilinc, Musa, Jason Beringer, Lindsay B. Hutley, Vanessa Haverd, and Nigel J. Tapper. 2012. “An Analysis of the Surface Energy Budget Above the World’s Tallest Angiosperm Forest.” *Agricultural and Forest Meteorology* 166: 23–31. doi:10.1016/j.agrformet.2012.05.014.

Knohl, Alexander, Ernst-Detlef Schulze, Olaf Kolle, and Nina Buchmann. 2003. “Large Carbon Uptake by an Unmanaged 250-Year-Old Deciduous Forest in Central Germany.” *Agricultural and Forest Meteorology* 118 (3–4): 151–67. doi:10.1016/S0168-1923(03)00115-1.

Krishnan, Praveena, Tilden P. Meyers, Russell L. Scott, Linda Kennedy, and Mark Heuer. 2012. “Energy Exchange and Evapotranspiration over Two Temperate Semi-Arid Grasslands in North America.” *Agricultural and Forest Meteorology* 153 (Supplement C): 31–44. doi:10.1016/j.agrformet.2011.09.017.

Kurbatova, J., C. Li, A. Varlagin, X. Xiao, and N. Vygodskaya. 2008. “Modeling Carbon Dynamics in Two Adjacent Spruce Forests with Different Soil Conditions in Russia.” *Biogeosciences* 5 (4): 969–80. doi:10.5194/bg-5-969-2008.

Kurbatova, Juliya, Almut Arneth, Natasha N. Vygodskaya, Olaf Kolle, Andrej V. Varlargin, Irena M. Milyukova, Nadja M. Tchebakova, E.-D. Schulze, and Jon Lloyd. 2002. “Comparative Ecosystem-Atmosphere Exchange of Energy and Mass in a European Russian and a Central Siberian Bog I. Interseasonal and Interannual Variability of Energy and Latent Heat Fluxes During the Snowfree Period.” *Tellus B: Chemical and Physical Meteorology* 54 (5): 497–513. doi:10.1034/j.1600-0889.2002.01354.x.

Kutsch, W. L., M. Aubinet, N. Buchmann, P. Smith, B. Osborne, W. Eugster, M. Wattenbach, et al. 2010. “The Net Biome Production of Full Crop Rotations in Europe.” *Agriculture, Ecosystems & Environment* 139 (3): 336–45. doi:10.1016/j.agee.2010.07.016.

Lafleur, Peter M., Nigel T. Roulet, Jill L. Bubier, Steve Frolking, and Tim R. Moore. 2003. “Interannual Variability in the Peatland-Atmosphere Carbon Dioxide Exchange at an Ombrotrophic Bog.” *Global Biogeochemical Cycles* 17 (2): 1–14. doi:10.1029/2002GB001983.

Lagergren, Fredrik, Anders Lindroth, Ebba Dellwik, Andreas Ibrom, Harry Lankreijer, Samuli Launiainen, Meelis Mölder, Pasi Kolari, Kim Pilegaard, and Timo Vesala. 2008. “Biophysical Controls on CO2 Fluxes of Three Northern Forests Based on Long-Term Eddy Covariance Data.” *Tellus B: Chemical and Physical Meteorology* 60 (2): 143–52. doi:10.1111/j.1600-0889.2006.00324.x.

Lipson, David A., Richard F. Wilson, and Walter C. Oechel. 2005. “Effects of Elevated Atmospheric CO2 on Soil Microbial Biomass, Activity, and Diversity in a Chaparral Ecosystem.” *Applied and Environmental Microbiology* 71 (12): 8573–80. doi:10.1128/AEM.71.12.8573-8580.2005.

Liu, C., Z. Zhang, G. Sun, T. Zha, J. Zhu, L. Shen, J. Chen, X. Fang, and J. Chen. 2009. “Quantifying Evapotranspiration and Biophysical Regulations of a Poplar Plantation Assessed by Eddy Covariance and Sap-Flow Methods.” *Journal of Plant Ecology* 33 (4): 706–18. doi:10.3773/j.issn.1005-264x.2009.04.009.

Liu, Heping, James T. Randerson, Jamie Lindfors, and F. Stuart Chapin. 2005. “Changes in the Surface Energy Budget After Fire in Boreal Ecosystems of Interior Alaska: An Annual Perspective.” *Journal of Geophysical Research: Atmospheres* 110 (D13): 1–12. doi:10.1029/2004JD005158.

Loubet, Benjamin, Patricia Laville, Simon Lehuger, Eric Larmanou, Christophe Fléchard, Nicolas Mascher, Sophie Genermont, et al. 2011. “Carbon, Nitrogen and Greenhouse Gases Budgets over a Four Years Crop Rotation in Northern France.” *Plant and Soil* 343 (1): 109–37. doi:10.1007/s11104-011-0751-9.

Ma, Siyan, Dennis D. Baldocchi, Liukang Xu, and Ted Hehn. 2007. “Inter-Annual Variability in Carbon Dioxide Exchange of an Oak/Grass Savanna and Open Grassland in California.” *Agricultural and Forest Meteorology* 147 (3–4): 157–71. doi:10.1016/j.agrformet.2007.07.008.

Marcolla, Barbara, and Alessandro Cescatti. 2005. “Experimental Analysis of Flux Footprint for Varying Stability Conditions in an Alpine Meadow.” *Agricultural and Forest Meteorology* 135 (1–4): 291–301. doi:10.1016/j.agrformet.2005.12.007.

Marcolla, Barbara, Alessandro Cescatti, Leonardo Montagnani, Giovanni Manca, Günther Kerschbaumer, and Stefano Minerbi. 2005. “Importance of Advection in the Atmospheric CO2 Exchanges of an Alpine Forest.” *Agricultural and Forest Meteorology* 130 (3): 193–206. doi:10.1016/j.agrformet.2005.03.006.

Marek, Michal V., Dalibor Janouš, Klára Taufarová, Kateřina Havránková, Marian Pavelka, Věroslav Kaplan, and Irena Marková. 2011. “Carbon Exchange Between Ecosystems and Atmosphere in the Czech Republic Is Affected by Climate Factors.” *Environmental Pollution* 159 (5): 1035–9. doi:10.1016/j.envpol.2010.11.025.

Matese, A., G. Alberti, B. Gioli, P. Toscano, F.P. Vaccari, and A. Zaldei. 2008. “Compact\_Eddy: A Compact, Low Consumption Remotely Controlled Eddy Covariance Logging System.” *Computers and Electronics in Agriculture* 64 (2): 343–46. doi:10.1016/j.compag.2008.07.002.

McCaughey, J. H., M. R. Pejam, M. A. Arain, and D. A. Cameron. 2006. “Carbon Dioxide and Energy Fluxes from a Boreal Mixedwood Forest Ecosystem in Ontario, Canada.” *Agricultural and Forest Meteorology* 140 (1): 79–96. doi:10.1016/j.agrformet.2006.08.010.

Merbold, L., J. Ardö, A. Arneth, R. J. Scholes, Y. Nouvellon, A. de Grandcourt, S.Archibald, et al. 2009. “Precipitation as Driver of Carbon Fluxes in 11 African Ecosystems.” *Biogeosciences* 6 (6): 1027–41. doi:10.5194/bg-6-1027-2009.

Meyers, Tilden P., and Steven E. Hollinger. 2004. “An Assessment of Storage Terms in the Surface Energy Balance of Maize and Soybean.” *Agricultural and Forest Meteorology* 125 (1–2): 105–15. doi:10.1016/j.agrformet.2004.03.001.

Migliavacca, Mirco, Michele Meroni, Giovanni Manca, Giorgio Matteucci, Leonardo Montagnani, Giacomo Grassi, Terenzio Zenone, et al. 2009. “Seasonal and Interannual Patterns of Carbon and Water Fluxes of a Poplar Plantation Under Peculiar Eco-Climatic Conditions.” *Agricultural and Forest Meteorology* 149 (9): 1460–76. doi:10.1016/j.agrformet.2009.04.003.

Mkhabela, M. S., B. D. Amiro, A. G. Barr, T. A. Black, I. Hawthorne, J. Kidston, J. H. McCaughey, et al. 2009. “Comparison of Carbon Dynamics and Water Use Efficiency Following Fire and Harvesting in Canadian Boreal Forests.” *Agricultural and Forest Meteorology* 149 (5): 783–94. doi:10.1016/j.agrformet.2008.10.025.

Molen, M. K. van der, J. van Huissteden, F. J. W. Parmentier, A. M. R. Petrescu, A. J. Dolman, T. C. Maximov, A. V. Kononov, S. V. Karsanaev, and D. A. Suzdalov. 2007. “The Growing Season Greenhouse Gas Balance of a Continental Tundra Site in the Indigirka Lowlands, NE Siberia.” *Biogeosciences* 4 (6): 985–1003. doi:10.5194/bg-4-985-2007.

Monson, R. K., A. A. Turnipseed, J. P. Sparks, P. C. Harley, L. E. Scott-Denton, K. Sparks, and T. E. Huxman. 2002. “Carbon Sequestration in a High-Elevation, Subalpine Forest.” *Global Change Biology* 8 (5): 459–78. doi:10.1046/j.1365-2486.2002.00480.x.

Moors, Eddy J., Cor Jacobs, Wilma Jans, Iwan Supit, Werner L. Kutsch, Christian Bernhofer, Pierre Béziat, et al. 2010. “Variability in Carbon Exchange of European Croplands.” *Agriculture, Ecosystems & Environment* 139 (3): 325–35. doi:10.1016/j.agee.2010.04.013.

Moureaux, Christine, Alain Debacq, Bernard Bodson, Bernard Heinesch, and Marc Aubinet. 2006. “Annual Net Ecosystem Carbon Exchange by a Sugar Beet Crop.” *Agricultural and Forest Meteorology* 139 (1): 25–39. doi:10.1016/j.agrformet.2006.05.009.

Nagy, Z., K. Pintér, Sz. Czóbel, J. Balogh, L. Horváth, Sz. Fóti, Z. Barcza, et al. 2007. “The Carbon Budget of Semi-Arid Grassland in a Wet and a Dry Year in Hungary.” *Agriculture, Ecosystems & Environment* 121 (1–2): 21–29. doi:10.1016/j.agee.2006.12.003.

Noormets, Asko, Steve G. McNulty, Jean-Christophe Domec, Michael Gavazzi, Ge Sun, and John S. King. 2012. “The Role of Harvest Residue in Rotation Cycle Carbon Balance in Loblolly Pine Plantations. Respiration Partitioning Approach.” *Global Change Biology* 18 (10): 3186–3201. doi:10.1111/j.1365-2486.2012.02776.x.

Owen, Katherine E., John Tenhunen, Markus Reichstein, Quan Wang, Eva Falge, Ralf Geyer, Xiangming Xiao, et al. 2007. “Linking Flux Network Measurements to Continental Scale Simulations: Ecosystem Carbon Dioxide Exchange Capacity Under Non-Water-Stressed Conditions.” *Global Change Biology* 13 (4): 734–60. doi:10.1111/j.1365-2486.2007.01326.x.

Peichl, Matthias, Jason J. Brodeur, Myroslava Khomik, and M. Altaf Arain. 2010. “Biometric and Eddy-Covariance Based Estimates of Carbon Fluxes in an Age-Sequence of Temperate Pine Forests.” *Agricultural and Forest Meteorology* 150 (7–8): 952–65. doi:10.1016/j.agrformet.2010.03.002.

Peichl, Matthias, Paul Leahy, and Gerard Kiely. 2011. “Six-Year Stable Annual Uptake of Carbon Dioxide in Intensively Managed Humid Temperate Grassland.” *Ecosystems* 14 (1): 112–26. doi:10.1007/s10021-010-9398-2.

Pereira, J. S., J. A. Mateus, L. M. Aires, G. Pita, C. Pio, J. S. David, V. Andrade, et al. 2007. “Net Ecosystem Carbon Exchange in Three Contrasting Mediterranean Ecosystems – the Effect of Drought.” *Biogeosciences* 4 (5): 791–802. doi:10.5194/bg-4-791-2007.

Perez-Priego, Oscar, Tarek S. El-Madany, Mirco Migliavacca, Andrew S. Kowalski, Martin Jung, Arnaud Carrara, Olaf Kolle, et al. 2017. “Evaluation of Eddy Covariance Latent Heat Fluxes with Independent Lysimeter and Sapflow Estimates in a Mediterranean Savannah Ecosystem.” *Agricultural and Forest Meteorology* 236 (Supplement C): 87–99. doi:10.1016/j.agrformet.2017.01.009.

Pilegaard, K., P. Hummelshøj, N. O. Jensen, and Z. Chen. 2001. “Two Years of Continuous CO2 Eddy-Flux Measurements over a Danish Beech Forest.” *Agricultural and Forest Meteorology* 107 (1): 29–41. doi:10.1016/S0168-1923(00)00227-6.

Powell, Thomas L., Rosvel Bracho, Jiahong Li, Sabina Dore, C. Ross Hinkle, and Bert G. Drake. 2006. “Environmental Controls over Net Ecosystem Carbon Exchange of Scrub Oak in Central Florida.” *Agricultural and Forest Meteorology* 141 (1): 19–34. doi:10.1016/j.agrformet.2006.09.002.

Powell, Thomas L., Henry L. Gholz, Kenneth L. Clark, Gregory Starr, Wendell P. Cropper Jr., and Timothy A. Martin. 2008. “Carbon Exchange of a Mature, Naturally Regenerated Pine Forest in North Florida.” *Global Change Biology* 14 (11): 2523–38. doi:10.1111/j.1365-2486.2008.01675.x.

Reichstein, Markus, Ana Rey, Annette Freibauer, John Tenhunen, Riccardo Valentini, Joao Banza, Pere Casals, et al. 2003. “Modeling Temporal and Large-Scale Spatial Variability of Soil Respiration from Soil Water Availability, Temperature and Vegetation Productivity Indices.” *Global Biogeochemical Cycles* 17 (4): 1–15. doi:10.1029/2003GB002035.

Restrepo-Coupe, Natalia, Humberto R. da Rocha, Lucy R. Hutyra, Alessandro C. da Araujo, Laura S. Borma, Bradley Christoffersen, Osvaldo M. R. Cabral, et al. 2013. “What Drives the Seasonality of Photosynthesis Across the Amazon Basin? A Cross-Site Analysis of Eddy Flux Tower Measurements from the Brasil Flux Network.” *Agricultural and Forest Meteorology* 182–183: 128–44. doi:10.1016/j.agrformet.2013.04.031.

Rey, Ana, Emiliano Pegoraro, Vanessa Tedeschi, Ilaria De Parri, Paul G. Jarvis, and Riccardo Valentini. 2002. “Annual Variation in Soil Respiration and Its Components in a Coppice Oak Forest in Central Italy.” *Global Change Biology* 8 (9): 851–66. doi:10.1046/j.1365-2486.2002.00521.x.

Rodrigues, Abel, Gabriel Pita, Joao Mateus, Cathy Kurz-Besson, Migeual Casquilho, Sofia Cerasoli, Alberto Gomes, and Joao Pereira. 2011. “Eight Years of Continuous Carbon Fluxes Measurements in a Portuguese Eucalypt Stand Under Two Main Events: Drought and Felling.” *Agricultural and Forest Meteorology* 151: 493–507. doi:10.1016/j.agrformet.2010.12.007.

Roupsard, Olivier, Jean-Marc Bonnefond, Mark Irvine, Paul Berbigier, Yann Nouvellon, Jean Dauzat, Serge Taga, et al. 2006. “Partitioning Energy and Evapo-Transpiration Above and Below a Tropical Palm Canopy.” *Agricultural and Forest Meteorology* 139 (3): 252–68. doi:10.1016/j.agrformet.2006.07.006.

Saito, Makoto, Akira Miyata, Hideyuki Nagai, and Tomoyasu Yamada. 2005. “Seasonal Variation of Carbon Dioxide Exchange in Rice Paddy Field in Japan.” *Agricultural and Forest Meteorology* 135 (1): 93–109. doi:10.1016/j.agrformet.2005.10.007.

Schindler, Dirk, Matthias Türk, and Helmut Mayer. 2006. “CO2 Fluxes of a Scots Pine Forest Growing in the Warm and Dry Southern Upper Rhine Plain, SW Germany.” *European Journal of Forest Research* 125 (3): 201–12. doi:10.1007/s10342-005-0107-1.

Schmid, Hans Peter, C. Susan B. Grimmond, Ford Cropley, Brian Offerle, and Hong-Bing Su. 2000. “Measurements of CO2 and Energy Fluxes over a Mixed Hardwood Forest in the Mid-Western United States.” *Agricultural and Forest Meteorology* 103 (4): 357–74. doi:10.1016/S0168-1923(00)00140-4.

Scott, Russell L., Erik P. Hamerlynck, G. Darrel Jenerette, M. Susan Moran, and Greg A. Barron-Gafford. 2010. “Carbon Dioxide Exchange in a Semidesert Grassland Through Drought-Induced Vegetation Change.” *Journal of Geophysical Research: Biogeosciences* 115 (G3): 1–12. doi:10.1029/2010JG001348.

Scott, Russell L., G. Darrel Jenerette, Daniel L. Potts, and Travis E. Huxman. 2009. “Effects of Seasonal Drought on Net Carbon Dioxide Exchange from a Woody-Plant-Encroached Semiarid Grassland.” *Journal of Geophysical Research: Biogeosciences* 114 (G4): 1–13. doi:10.1029/2008JG000900.

Smallman, Luke, J.B. Moncrieff, and Mathew Williams. 2013. “WRFv3.2-SPAv2: Development and Validation of a Coupled Ecosystem-Atmosphere Model, Scaling from Surface Fluxes of CO2 and Energy to Atmospheric Profiles.” *Geoscientific Model Development* 6 (4): 1079–93. doi:10.5194/gmd-6-1079-2013.

Soegaard, Henrik, Niels Otto Jensen, Eva Boegh, Charlotte Bay Hasager, Kirsten Schelde, and Anton Thomsen. 2003. “Carbon Dioxide Exchange over Agricultural Landscape Using Eddy Correlation and Footprint Modelling.” *Agricultural and Forest Meteorology* 114 (3): 153–73. doi:10.1016/S0168-1923(02)00177-6.

Soussana, J. F., V. Allard, K. Pilegaard, P. Ambus, C. Amman, C. Campbell, E. Ceschia, et al. 2007. “Full Accounting of the Greenhouse Gas (Co2, N2o, Ch4) Budget of Nine European Grassland Sites.” *Agriculture, Ecosystems & Environment* 121 (1): 121–34. doi:10.1016/j.agee.2006.12.022.

Spano, D., R. L. Snyder, C. Sirca, and P. Duce. 2009. “ECOWAT–A Model for Ecosystem Evapotranspiration Estimation.” *Agricultural and Forest Meteorology* 149 (10): 1584–96. doi:10.1016/j.agrformet.2009.04.011.

Stoy, Paul C., Gabriel G. Katul, Mario B. S. Siqueira, Jehn-Yih Juang, Kimberly A. Novick, Heather R. McCarthy, A. Christopher Oishi, Joshua M. Uebelherr, and Hyun-Seok Kim an Ram Oren. 2006. “Separating the Effects of Climate and Vegetation on Evapotranspiration Along a Successional Chronosequence in the Southeastern US.” *Global Change Biology* 12 (11): 2115–35. doi:10.1111/j.1365-2486.2006.01244.x.

Sturm, Patrick, Markus Leuenberger, John Moncrieff, and Michel Ramonet. 2005. “Atmospheric O2, CO2 and *δ*13C Measurements from Aircraft Sampling over Griffin Forest, Perthshire, UK.” *Rapid Communications in Mass Spectrometry* 19 (17): 2399–2406. doi:10.1002/rcm.2071.

Suni, Tanja, Janne Rinne, Anni Reissell, Nuria Altimir, Petri Keronen, Üllar Rannik, Miikka Dal Maso, Markku Kulmala, and Timo Vesala. 2003. “Long-Term Measurements of Surface Fluxes Above a Scots Pine Forest in Hyytiala, Southern Finland, 1996-2001.” *Boreal Environment Research* 8 (4): 287–302.

Syed, Kamran H., Lawrence B. Flanagan, Peter J. Carlson, Aaron J. Glenn, and K. Eric Van Gaalen. 2006. “Environmental Control of Net Ecosystem CO2 Exchange in a Treed, Moderately Rich Fen in Northern Alberta.” *Agricultural and Forest Meteorology* 140 (1): 97–114. doi:10.1016/j.agrformet.2006.03.022.

Tedeschi, Vanessa, Ana Rey, Giovanni Manca, Riccardo Valentini, Paul G. Jarvis, and Marco Borghetti. 2006. “Soil Respiration in a Mediterranean Oak Forest at Different Developmental Stages After Coppicing.” *Global Change Biology* 12 (1): 110–21. doi:10.1111/j.1365-2486.2005.01081.x.

Thum, Tea, Tuula Aalto, Tuomas Laurila, Mika Aurela, Pasi Kolari, and Pertti Hari. 2007. “Parametrization of Two Photosynthesis Models at the Canopy Scale in a Northern Boreal Scots Pine Forest.” *Tellus B: Chemical and Physical Meteorology* 59 (5): 874–90. doi:10.1111/j.1600-0889.2007.00305.x.

Urbanski, S., C. Barford, S. Wofsy, C. Kucharik, E. Pyle, J. Budney, K. McKain, D. Fitzjarrald, M. Czikowsky, and J. W. Munger. 2007. “Factors Controlling CO2 Exchange on Timescales from Hourly to Decadal at Harvard Forest.” *Journal of Geophysical Research: Biogeosciences* 112 (G2): 1–25. doi:10.1029/2006JG000293.

Vaccari, F. P., E. Lugato, B. Gioli, L. D’Acqui, L. Genesio, P. Toscano, A. Matese, and F. Miglietta. 2012. “Land Use Change and Soil Organic Carbon Dynamics in Mediterranean Agro-Ecosystems: The Case Study of Pianosa Island.” *Geoderma* 175–176 (Supplement C): 29–36. doi:10.1016/j.geoderma.2012.01.021.

Valentini, R., P. de Angelis, G. Matteucci, R. Monaco, S. Dore, and G. E. Scarascia Mucnozza. 1996. “Seasonal Net Carbon Dioxide Exchange of a Beech Forest with the Atmosphere.” *Global Change Biology* 2 (3): 199–207. doi:10.1111/j.1365-2486.1996.tb00072.x.

Verma, Shashi B., Achim Dobermann, Kenneth G. Cassman, Daniel T. Walters, Johannes M. Knops, Timothy J. Arkebauer, Andrew E. Suyker, et al. 2005. “Annual Carbon Dioxide Exchange in Irrigated and Rainfed Maize-Based Agroecosystems.” *Agricultural and Forest Meteorology* 131 (1): 77–96. doi:10.1016/j.agrformet.2005.05.003.

Vickers, Dean, Christoph Thomas, and Beverly E. Law. 2009. “Random and Systematic CO2 Flux Sampling Errors for Tower Measurements over Forests in the Convective Boundary Layer.” *Agricultural and Forest Meteorology* 149 (1): 73–83. doi:10.1016/j.agrformet.2008.07.005.

Wang, Wenhui, Shunlin Liang, and Tilden Meyers. 2008. “Validating MODIS Land Surface Temperature Products Using Long-Term Nighttime Ground Measurements.” *Remote Sensing of Environment* 112 (3): 623–35. doi:10.1016/j.rse.2007.05.024.

Wilkinson, M., E. L. Eaton, M. S. J. Broadmeadow, and J. I. L. Morison. 2012. “Inter-Annual Variation of Carbon Uptake by a Plantation Oak Woodland in South-Eastern England.” *Biogeosciences* 9 (12): 5373–89. doi:10.5194/bg-9-5373-2012.

Williams, Christopher A., and John D. Albertson. 2004. “Soil Moisture Controls on Canopy-Scale Water and Carbon Fluxes in an African Savanna.” *Water Resources Research* 40 (9): 1–14. doi:10.1029/2004WR003208.

Wilske, Burkhard, Nan Lu, Long Wei, Shiping Chen, Tonggang Zha, Chenfeng Liu, Wenting Xu, et al. 2009. “Poplar Plantation Has the Potential to Alter the Water Balance in Semiarid Inner Mongolia.” *Journal of Environmental Management* 90 (8): 2762–70. doi:10.1016/j.jenvman.2009.03.004.

Wilson, T. B., and T. P. Meyers. 2007. “Determining Vegetation Indices from Solar and Photosynthetically Active Radiation Fluxes.” *Agricultural and Forest Meteorology* 144 (3): 160–79. doi:10.1016/j.agrformet.2007.04.001.

Wohlfahrt, Georg, Margaret Anderson-Dunn, Michael Bahn, Manuela Balzarolo, Frank Berninger, Claire Campbell, Arnaud Carrara, et al. 2008. “Biotic, Abiotic, and Management Controls on the Net Ecosystem CO2 Exchange of European Mountain Grassland Ecosystems.” *Ecosystems* 11 (8): 1338–51. doi:10.1007/s10021-008-9196-2.

Wohlfahrt, Georg, Albin Hammerle, Alois Haslwanter, Michael Bahn, Ulrike Tappeiner, and Alexander Cernusca. 2008. “Seasonal and Inter-Annual Variability of the Net Ecosystem CO2 Exchange of a Temperate Mountain Grassland: Effects of Weather and Management.” *Journal of Geophysical Research: Atmospheres* 113 (D08110): 1–14. doi:10.1029/2007JD009286.

Yan, Yaner, Bin Zhao, Jiquan Chen, Haiqiang Guo, Yongjian Gu, Qianhong Wu, and Bo Li. 2008. “Closing the Carbon Budget of Estuarine Wetlands with Tower-Based Measurements and MODIS Time Series.” *Global Change Biology* 14 (7): 1690–1702. doi:10.1111/j.1365-2486.2008.01589.x.

Yang, Yun, Martha Anderson, Feng Gao, Christopher Hain, William Kustas, Tilden Meyers, Wade Crow, et al. 2017. “Impact of Tile Drainage on Evapotranspiration in South Dakota, USA, Based on High Spatiotemporal Resolution Evapotranspiration Time Series from a Multisatellite Data Fusion System.” *IEEE Journal of Selected Topics in Applied Earth Observations and Remote Sensing* 10 (6): 2550–64. doi:10.1109/JSTARS.2017.2680411.

Zhang, W. L., S. P. Chen, J. Chen, L. Wei, X. G. Han, and G. H. Lin. 2007. “Biophysical Regulations of Carbon Fluxes of a Steppe and a Cultivated Cropland in Semiarid Inner Mongolia.” *Agricultural and Forest Meteorology* 146 (3): 216–29. doi:10.1016/j.agrformet.2007.06.002.
